# Supplementary material
Source: PubMed Central journal article supplement (PMC1449670)
Supplement: pnas_0600479103_2.pdf [file pnas_0600479103_2.pdf]

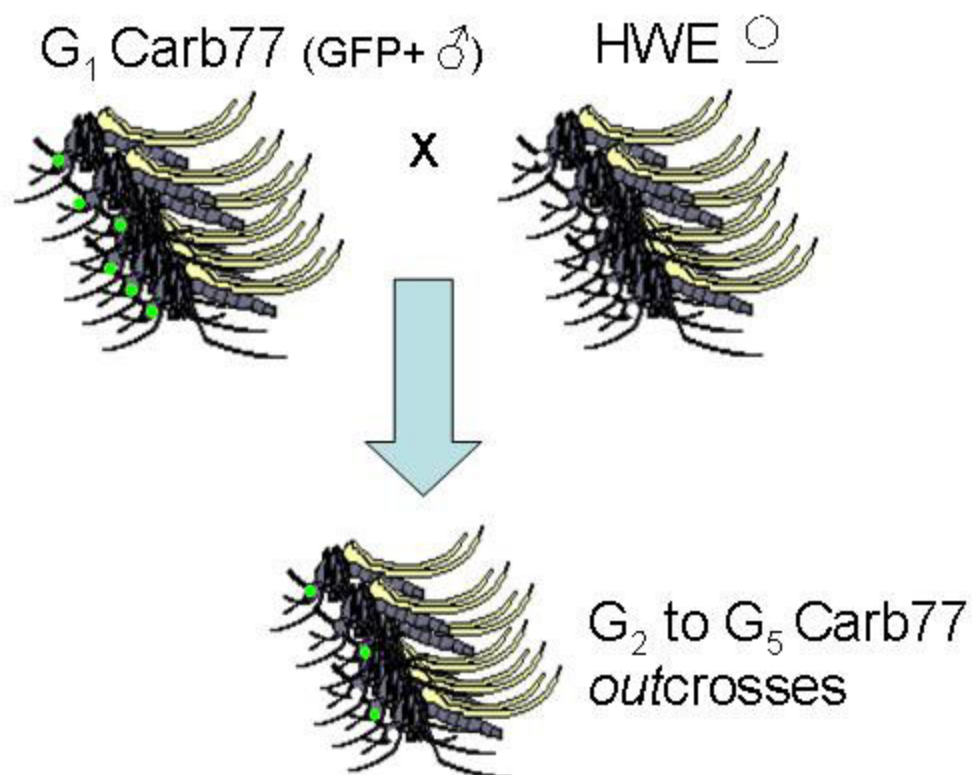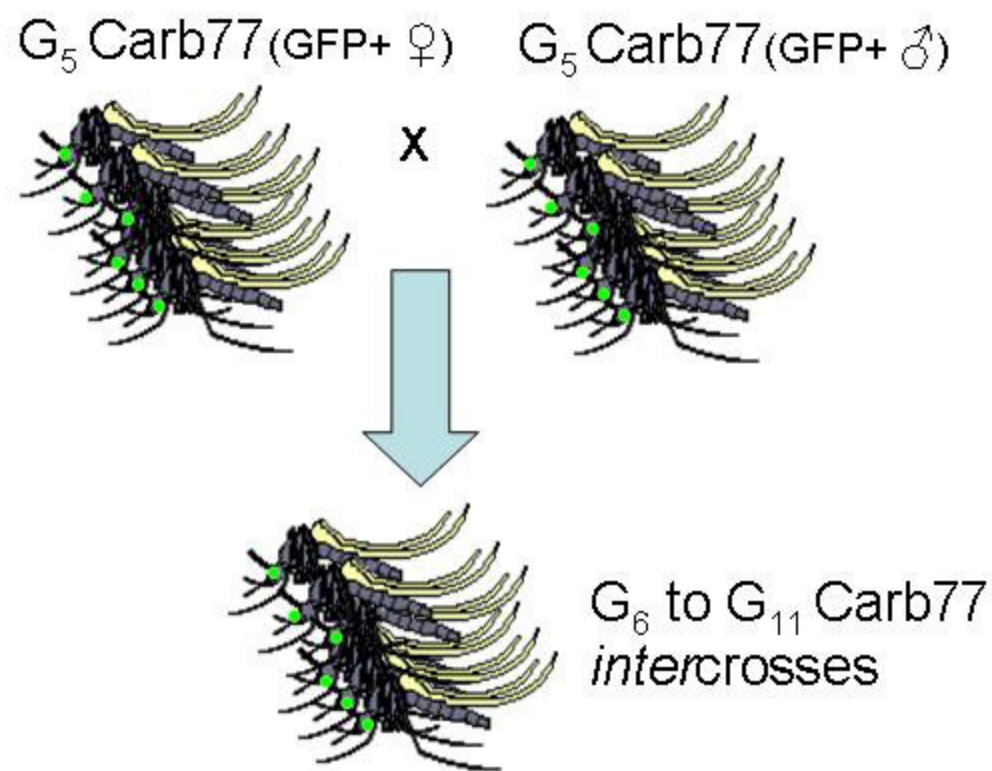

Carb77 outcross  $G_5$  line:

(Carb77 GFP+  $G_5$  males mated with HWE females)

Expected ratio: 50:50 (GFP : white)

Observed ratio: 493:507 (GFP : white)

Carb77 intercross  $G_6$  line:

(Carb77 GFP+  $G_5$  males mated with Carb77 GFP+  $G_5$  females)

Expected ratio: 75:25 (GFP : white)

Observed ratio: 710: 290 (GFP : white)
