# Supplementary material
Source: PubMed Central journal article supplement (PMC1449670)

**A.**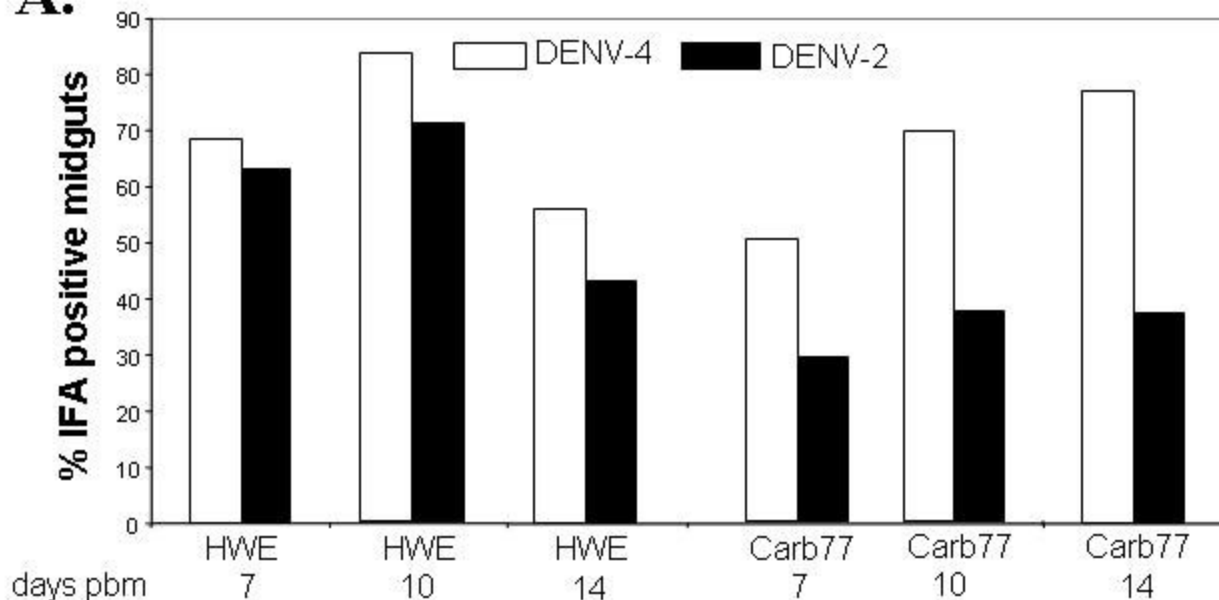**B.**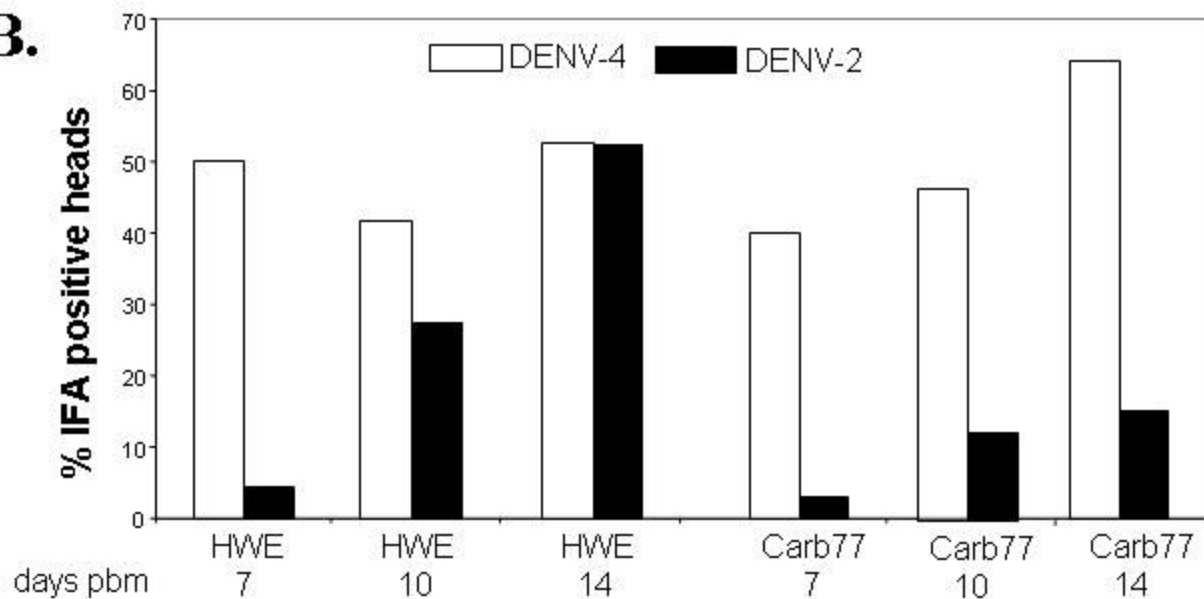

Supplement: pnas_0600479103_3.pdf [file pnas_0600479103_3.pdf]
